# Supplementary material for: Modifying the cancer-immune set point using vaccinia virus expressing re-designed interleukin-2
Source: PubMed Central journal article supplement (PMC6224581; doi:10.1038/s41467-018-06954-z), 2018-11-08
Supplement: 41467_2018_6954_MOESM1_ESM.pdf [file 41467_2018_6954_MOESM1_ESM.pdf]

**Modifying the cancer-immune set point using vaccinia virus expressing re-designed interleukin-2**

Liu et al.

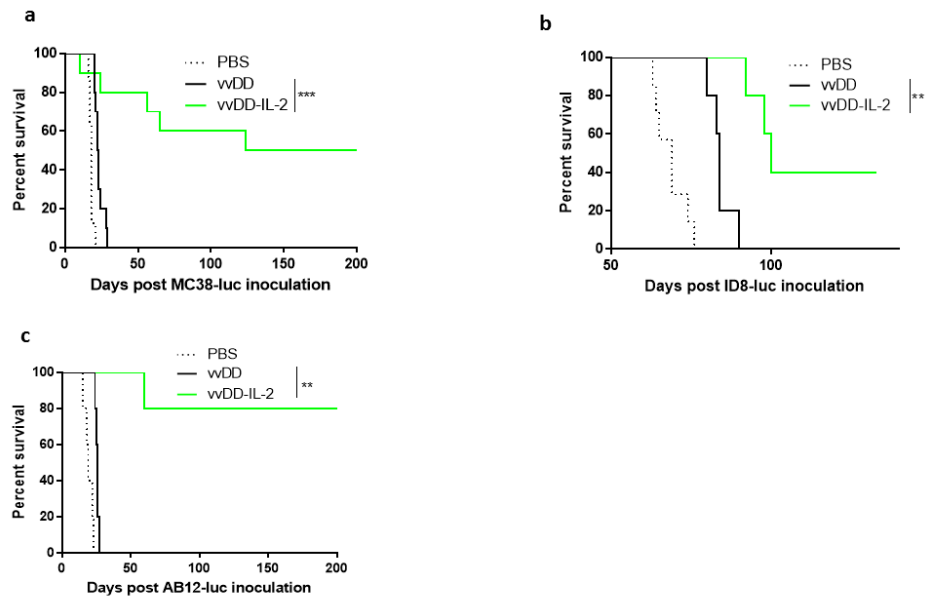

**Supplementary Figure 1 | Antitumour effect of vaccinia-delivered secreted IL-2.** B6 mice were inoculated i.p. with  $5 \times 10^5$  MC38-luc cells (ten mice per group) (a) or  $3.5 \times 10^6$  ID8-luc (five mice per group) (b) or BalB/c mice were i.p. inoculated with  $4 \times 10^5$  AB12-luc (five mice per group) (c) and treated with PBS, vvDD, and vvDD-IL-2 at  $2 \times 10^8$  PFU per mouse for MC38-luc model and  $1 \times 10^8$  PFU per mouse for AB12-luc model five days post-tumour inoculation or at  $2 \times 10^8$  PFU per mouse for ID8-luc model six days post-tumour inoculation. A log-rank (Mantel-Cox) test was used to compare survival rates. \*  $P < 0.05$ ; \*\*  $P < 0.01$ ; \*\*\*  $P < 0.001$ ; and \*\*\*\*  $P < 0.0001$ .

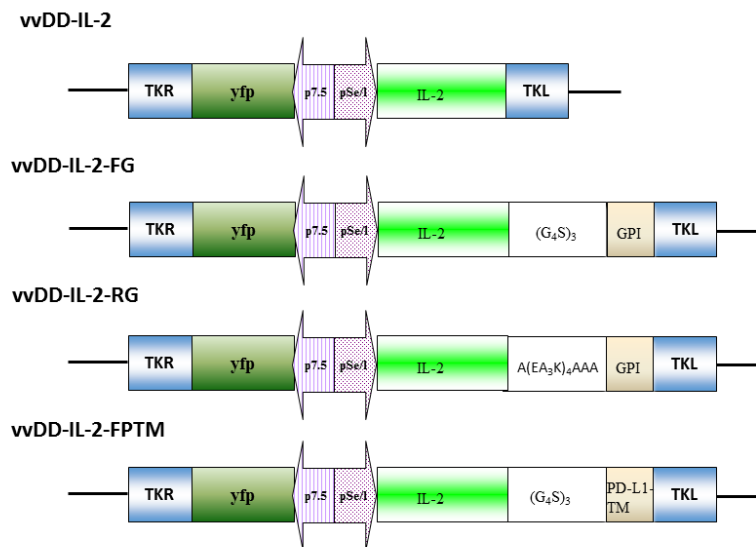

**Supplementary Figure 2 | Schematic diagram of viral IL-2 variants.** vvDD-IL-2, vvDD-IL-2-FG, vvDD-IL-2-RG, and vvDD-IL-2-FPTM were generated by homologous recombination of murine *IL-2* variants into the *tk* locus of vaccinia viral genome, carrying secreted IL-2, IL-2-flexible linker  $(G_4S)_3$ -GPI anchor sequence amplified from human CD16b, IL-2-rigid linker  $A(EA_3K)_4AAA$ -GPI anchor sequence amplified from human CD16b, and IL-2-flexible linker  $(G_4S)_3$ -murine PD-L1 transmembrane domain, respectively.

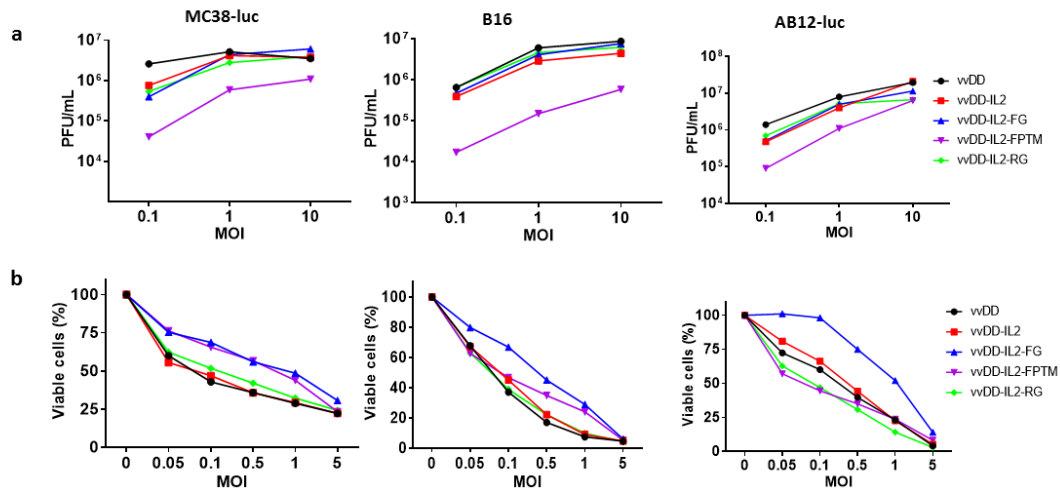

**Supplementary Figure 3 | Viral replication and cytotoxicity *in vitro*.** MC38-luc, B16, and AB12-luc tumour cells were mock-infected or infected with the indicated viruses. The production of viral progeny from infected cancer cells at 48 h post-infection was determined by plaque assay (a) or the viability of viral infected cells was determined by MTS assay (b). Data are representative of two independent experiments.

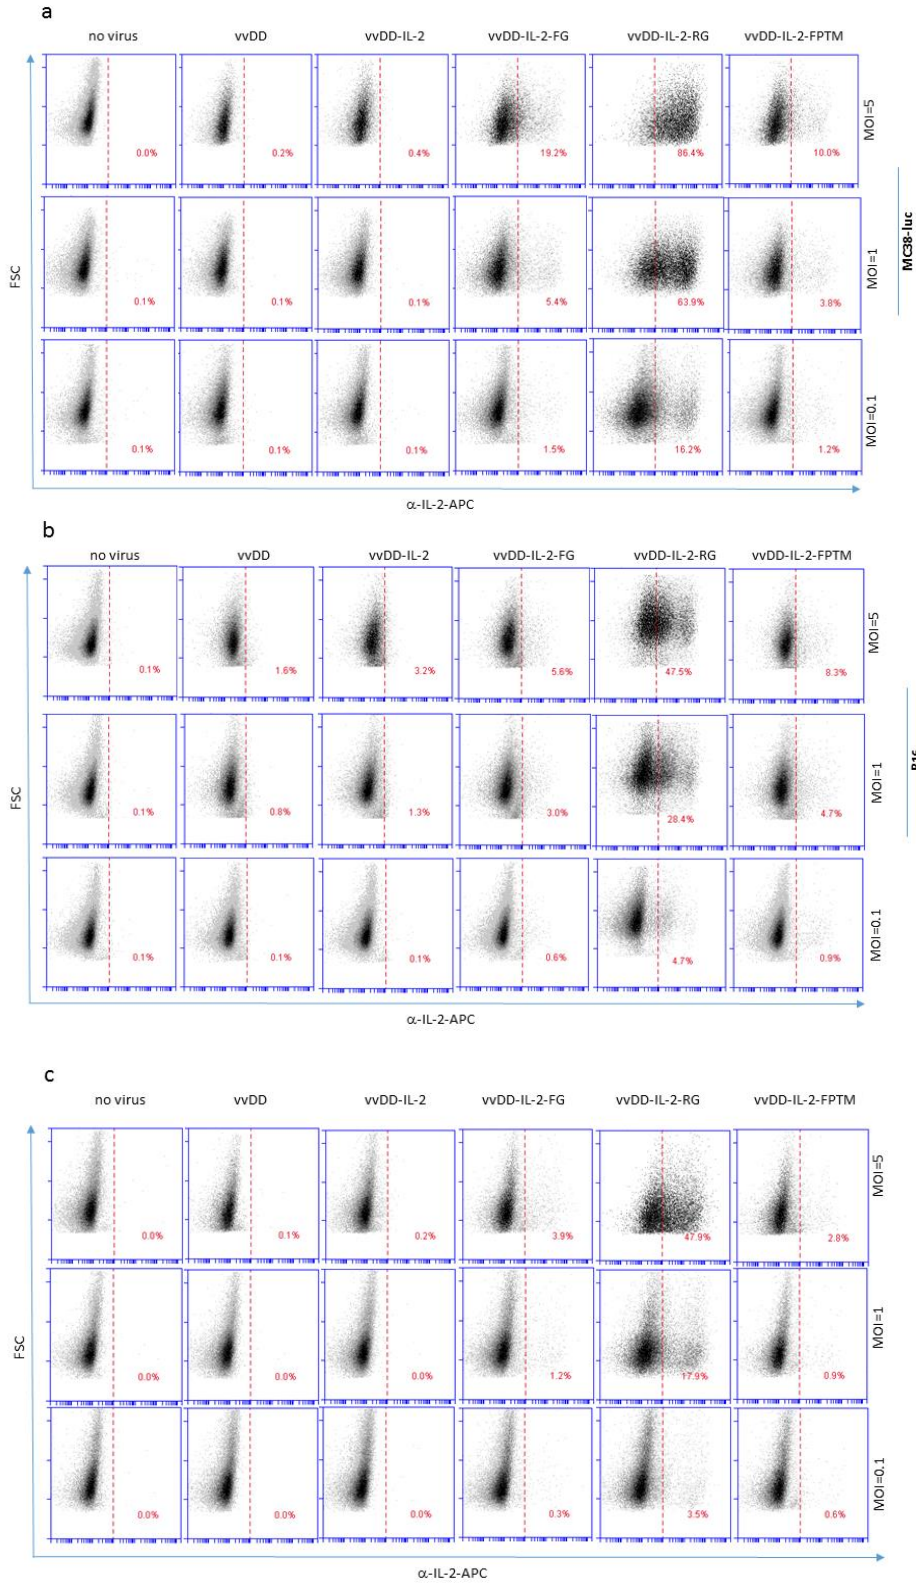

**Supplementary Figure 4 | Viral delivered IL-2 expression in tumour cells. Tumour cell**

MC38-luc ( $3 \times 10^5$  cells) (**a**), B16 ( $2 \times 10^5$  cells) (**b**), or AB12-luc ( $3 \times 10^5$  cells) (**c**) were mock-infected or infected with vvDD, vvDD-IL-2, vvDD-IL-2-FG, vvDD-IL-2-RG, or vvDD-IL-2-FPTM at a MOIs of 0.1, 1 and 5. The cell pellets were harvested and to measure membrane-bound IL-2 by by flow cytometry (cell surface staining).

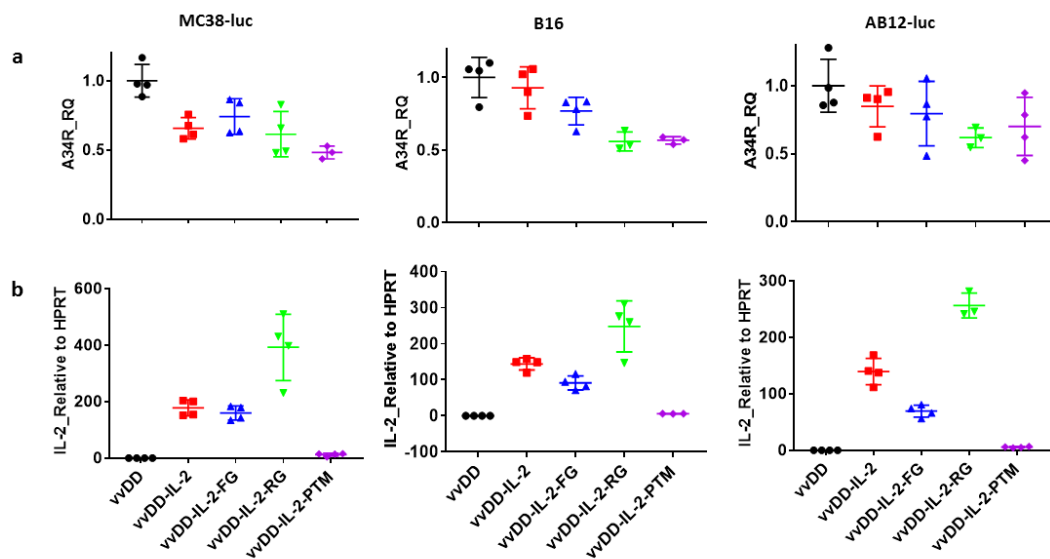

**Supplementary Figure 5 | Viral delivered IL-2 expression in tumour cells.** Tumour cell MC38-luc ( $3 \times 10^5$  cells), B16 ( $2 \times 10^5$  cells), or AB12-luc ( $3 \times 10^5$  cells) were mock-infected or infected with wvDD, wvDD-IL-2, wvDD-IL-2-FG, wvDD-IL-2-RG, or wvDD-IL-2-FPTM at a MOI of 1. The infected cells were harvested 24 h post-infection for RNA purification. Purified total RNAs were subject to RT-qPCR for quantitative detection of A34R mRNA (viral housekeeping gene) (a) or IL-2 (b). Data are representative of two independent experiments.

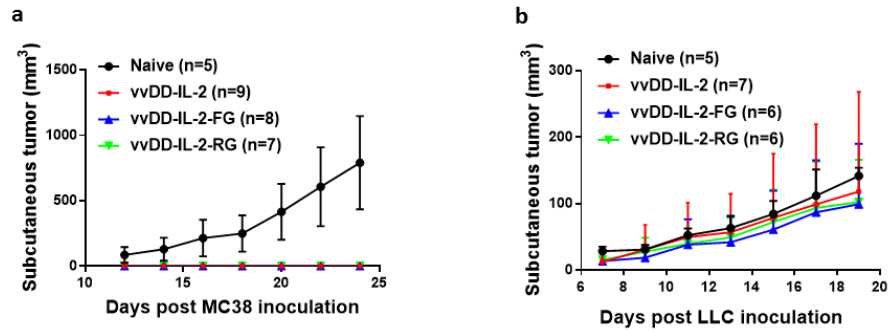

### Supplementary Figure 6 | Systemic antitumour immunity elicited by viral IL-2 variants.

Five-day old MC38-luc-bearing B6 mice treated with the indicated vaccinia viruses. Mice which survived more than 150 days, were subcutaneously challenged with  $5 \times 10^5$  MC38 or  $1 \times 10^6$  Lewis lung cancer cells per mouse. Naïve B6 mice received the same dose of tumour cells as a control. The growth curves of primary tumours are shown.



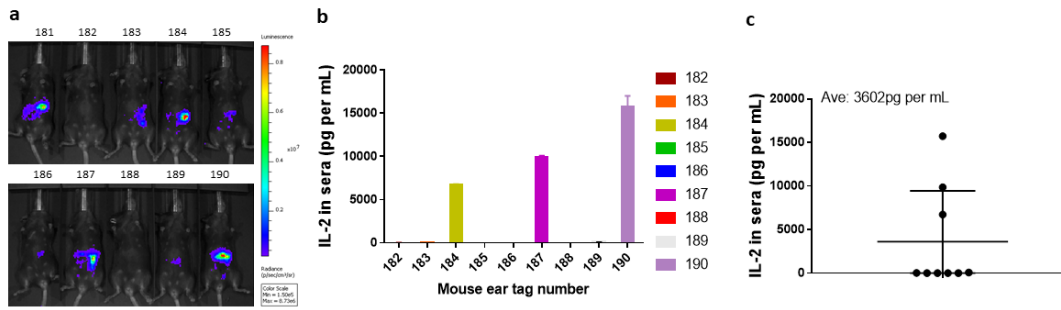

**Supplementary Figure 7 | Correlation of vaccinia virus-delivered IL-2 and tumour burden in the early-stage tumour model.** B6 mice were i.p. inoculated with  $5 \times 10^5$  MC38-luc cells. Five days later, these mice were imaged (**a**) and i.p. treated with vvDD-IL-2 ( $2 \times 10^8$  PFU per m). The sera were collected from treated mice five days post-treatment to measure IL-2 in sera by ELISA and the IL-2 in sera was shown by individual (**b**) or pooled (**c**). Mouse ET181 was dead at day 5 post-treatment.

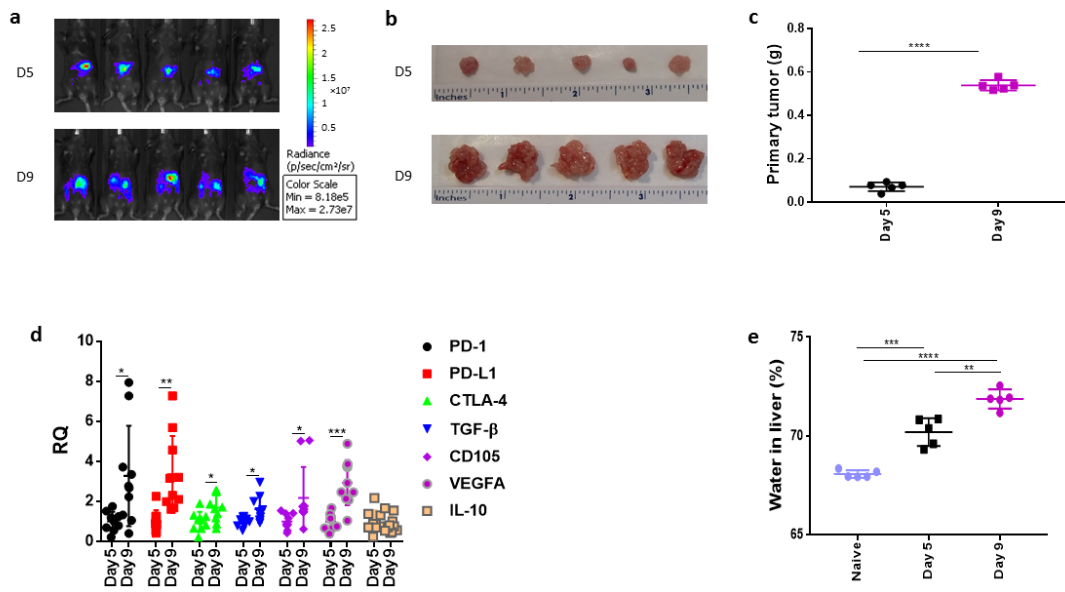

**Supplementary Figure 8 | Comparison of the immunosuppressive environments of early and late-stage tumour-bearing mice.** B6 mice were i.p. inoculated with  $5 \times 10^5$  MC38-luc cells and imaged with a Xenogen IVIS 200 Optical In Vivo Imaging System at day 5 and day 9 post-tumour inoculation (**a**). Tumour tissues were harvested five days or nine days post-tumour inoculation. Primary tumours were photographed (**b**), weighed (**c**), and applied to extract RNA for RT-qPCR to determine the expression of immunosuppressive factors (**d**). Livers were harvested, weighed, and dried to measure water content to determine hepatic oedema (**e**) ( $n=5$ ). Five mice were used for each group and data are representative of two independent experiments (**a-c**, **e**); nine mice were analysed for the day 5 tumour model and ten mice for the day 9 tumour model in RT-qPCR assay and data are combined from two independent experiments (**d**). \*  $P < 0.05$ ; \*\*  $P < 0.01$ ; \*\*\*  $P < 0.001$ ; and \*\*\*\*  $P < 0.0001$ .

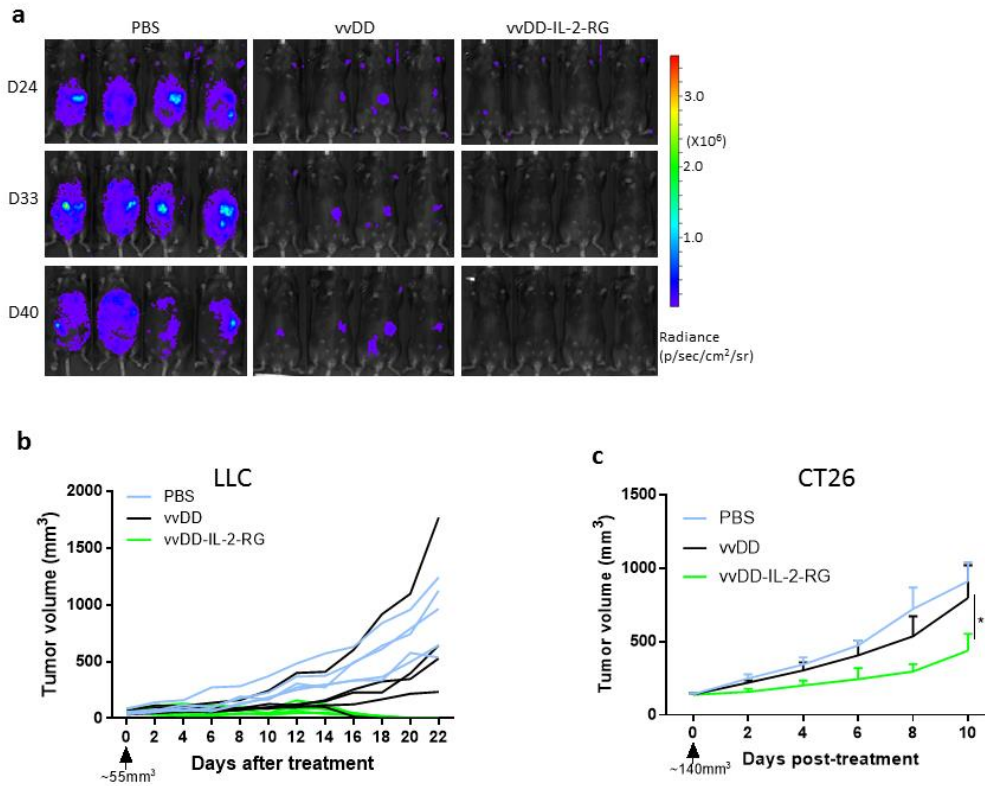

**Supplementary Figure 9 | Therapeutic effect of vvDD-IL-2-RG in multiple tumour model.**

B6 mice were i.p. inoculated with  $3.5 \times 10^6$  ID8-luc cells and treated with PBS, vvDD, or vvDD-IL-2-RG at  $2 \times 10^8$  PFU per mouse six days post-tumour inoculation and tumour growth was shown in (a). B6 or BalB/c mice were s.c. inoculated with  $1 \times 10^6$  LLC or CT26 cells and intra-tumoural treated with PBS, vvDD, or vvDD-IL-2-RG at  $1 \times 10^8$  PFU per mouse at the indicated tumour volume and primary tumour growth was shown in (b, c), respectively.

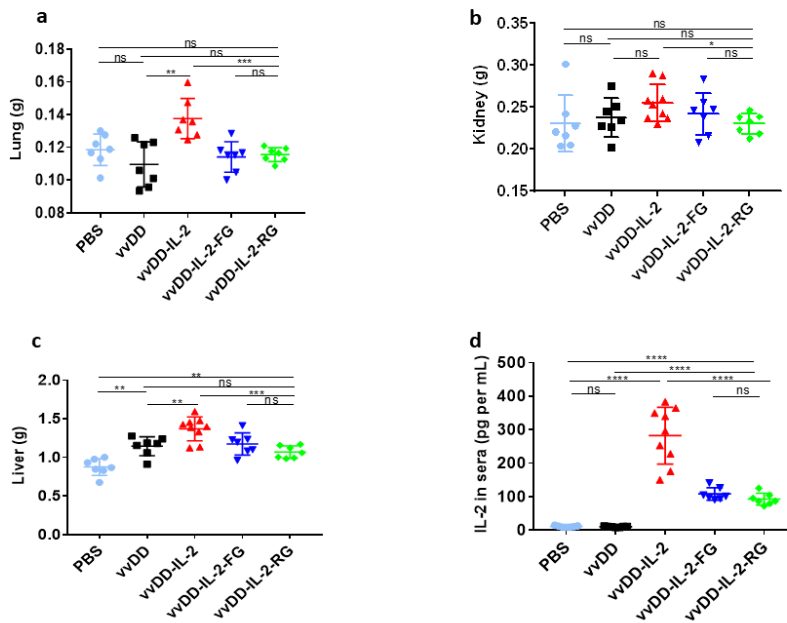

**Supplementary Figure 10 | Toxicity profile of vaccinia virus-delivered IL-2 in the early-stage tumour model.** B6 mice were i.p. inoculated with  $5 \times 10^5$  MC38-luc cells and treated with vVDD, vVDD-IL-2, vVDD-IL-2-FG, vVDD-IL-2-RG at  $2 \times 10^8$  PFU per mouse, or PBS five days post-tumour inoculation. The treated mice were sacrificed eight days post-treatment to measure water content (oedema) in lung (**a**), kidney (**b**), and liver (**c**), or to harvest blood to measure IL-2 (**d**) in sera. Data are combined from two independent experiments and seven mice were used for each group except nine mice used for vVDD-IL-2 treatment group in (**b-d**). \*  $P < 0.05$ ; \*\*  $P < 0.01$ ; \*\*\*  $P < 0.001$ ; and \*\*\*\*  $P < 0.0001$ . ns: not significant.

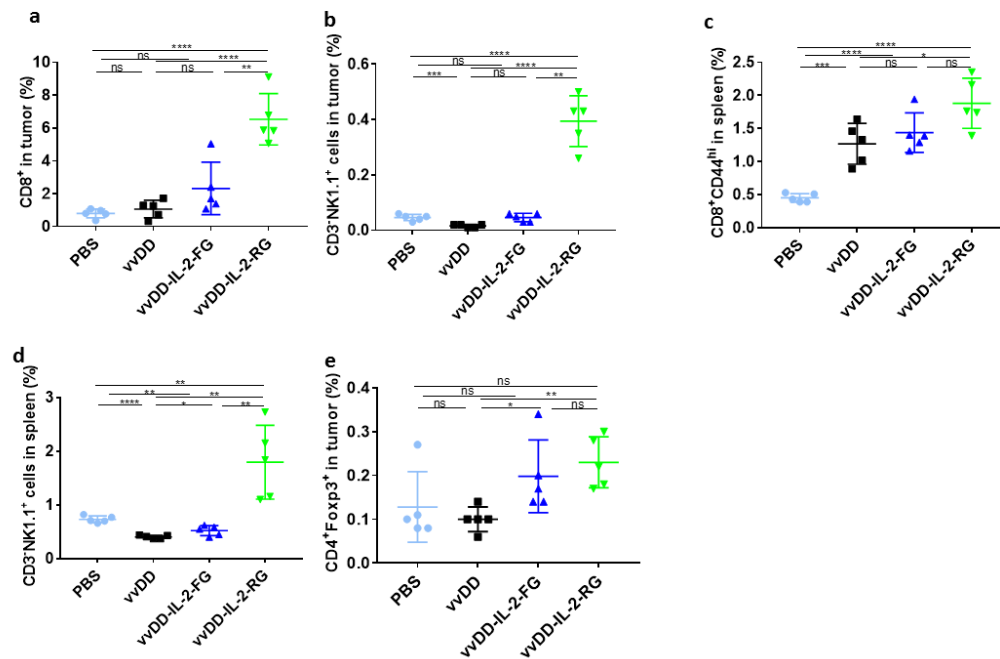

**Supplementary Figure 11 | Memory-phenotype CD8<sup>+</sup> T cells, NK cells and Treg cells in nine-day-tumour-bearing mice.** B6 mice were i.p. inoculated with  $5 \times 10^5$  MC38-luc cells and treated with PBS, vvDD, vvDD-IL-2-FG, or vvDD-IL-2-RG at  $2 \times 10^8$  PFU per mouse nine days post-tumour inoculation (n=5). Primary tumours and spleens were harvested five days post treatment and applied to make single cells and stained to determine CD8<sup>+</sup> in tumour (a), CD8<sup>+</sup>CD44<sup>hi</sup> in spleen (b), CD3<sup>+</sup>NK1.1<sup>+</sup> in tumour (c) and spleen (d), and Treg cells in tumour (e). Data are representative of two independent experiments. \*  $P < 0.05$ ; \*\*  $P < 0.01$ ; \*\*\*  $P < 0.001$ ; and \*\*\*\*  $P < 0.0001$ . ns: not significant.

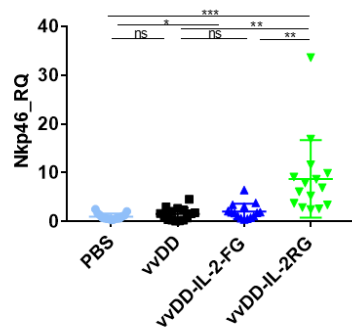

**Supplementary Figure 12 | Elevated NKP46 expression in nine-day-tumour-bearing mice post-viral treatment.** B6 mice were i.p. inoculated with  $5 \times 10^5$  MC38-luc cells and treated with PBS, vvDD, vvDD-IL-2-FG, or vvDD-IL-2-RG at  $2 \times 10^8$  PFU per mouse nine days post-tumour inoculation. Primary tumours were harvested five days post treatment and applied to extract RNA for RT-qPCR to determine the expression of NKP46. Data are combined from three independent experiments (n=15). \*  $P < 0.05$ ; \*\*  $P < 0.01$ ; \*\*\*  $P < 0.001$ ; and \*\*\*\*  $P < 0.0001$ . ns: not significant.

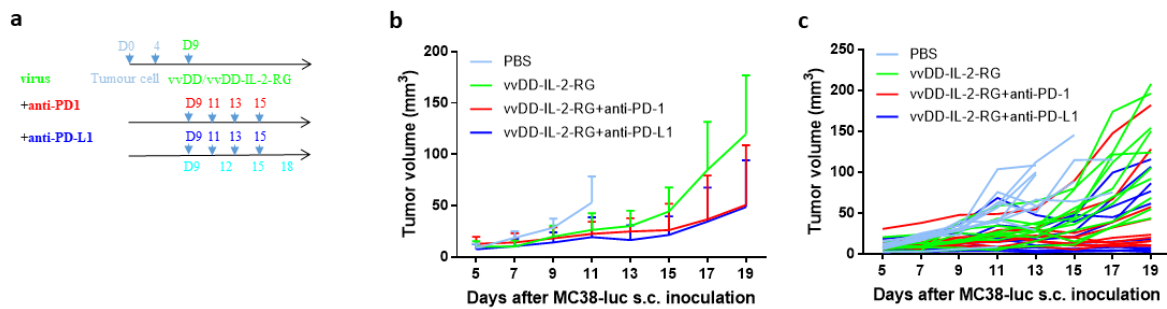

**Supplementary Figure 13 | Abscopal effect of vvDD-IL-2-RG alone or combined with PD-1/PD-L1 blockade.** B6 mice were i.p. inoculated with  $5 \times 10^5$  MC38-luc cells at day 0 and s.c. inoculated with  $5 \times 10^5$  MC38 at day 4. These tumour-bearing mice were treated with vvDD/PBS or vvDD-IL-2-RG alone or combined with anti-PD-1 Ab (200  $\mu$ g per injection), anti-PD-L1 Ab (200  $\mu$ g per injection) as scheduled (**a**), and the subcutaneous tumour growth was shown in pooled (**b**) or individual (**c**).

**Supplementary Table 1**

| Primer                                                                                                                                                                                  | PCR Template      | Resulting Plasmid |
|-----------------------------------------------------------------------------------------------------------------------------------------------------------------------------------------|-------------------|-------------------|
| p1:5' gcgggtcgacatatggcgcgatgcattataaggcgcgccccccctctccctccc3'<br>p2:5' ggccgtaacttaagagctcattaaatcctgcagggccggccattatcatcgtg3'                                                         | pLVX-IRES-ZsGreen | pCMS1-IRES        |
| p3:5' ggccggccggccggtggcgggtgggagcgggtgggggtccggaggcggagg3'<br>p4:5' ggtccggaggcggagggtcgggtcaacctctcatcattctc3'<br>p5:5' gcgcttaactcaaatgtttgtcttcacagag3'                             | Human CD16b cDNA  | pCMS1-IRES-FGPI   |
| p6:5' ggccggccggccgctgaagctgcgcgcaaaagaggccgctgcgaaggaggccggcggctaag3'<br>p7:5' gaggcccgcgctaaggagcggcagcctaaagctgcagccgtgtcaacctctcatcttc3'<br>p5:5' gcgcttaactcaaatgtttgtcttcacagag3' | Human CD16b cDNA  | pCMS1-IRES-RGPI   |
| p8:5' ggcggtcgacatgtacagcatgcagctcg3'<br>p9:5' ccgcccgcgccttattgaggcctgttgag3'                                                                                                          | Murine IL-2 cDNA  | pCMS1-IL-2-IRES   |
| p8:5' ggcggtcgacatgtacagcatgcagctcg3'<br>p10:5' ccgcccggcccttgaggcctgttgag3'                                                                                                            | Murine IL-2 cDNA  | pCMS1-IL-2-FG     |
| p8:5' ggcggtcgacatgtacagcatgcagctcg3'<br>p10:5' ccgcccggcccttgaggcctgttgag3'                                                                                                            | Murine IL-2 cDNA  | pCMS1-IL-2-RG     |
| p3:5' ggccggccggccggtggcgggtgggagcgggtgggggtccggaggcggagg3'<br>p11:5' ccggaggcgggtgggtcgcactgggtgcttctgggatc3'<br>p12:5' cgcgtaactacccaagaagaggaggaccgtggacactacaatgaggaacaacaggatg3'   | Murine PD-L1 cDNA | pCMS1-IL-2-FPTM   |
| p13:5' ggcgggatccatgtacagcatgcagctcg3'3'<br>p14:5' gcgcctcgagtcaaatgtttgtcttcacagag3'                                                                                                   | pCMS1-IL-2-RG     | plenti6-IL-2-RG   |
